# Supplementary material
Source: PubMed Central journal article supplement (PMC3675892)

# Supplemental Figure 1

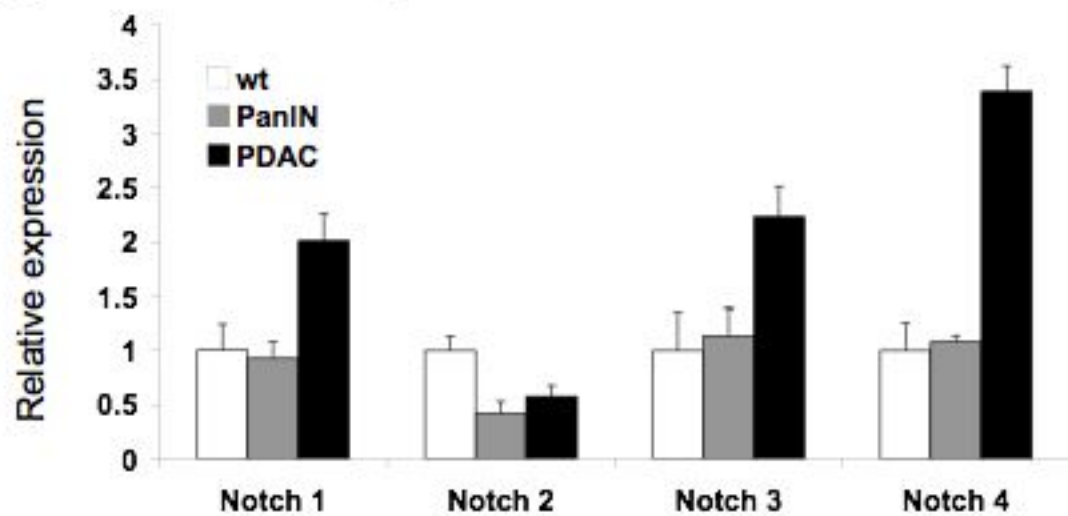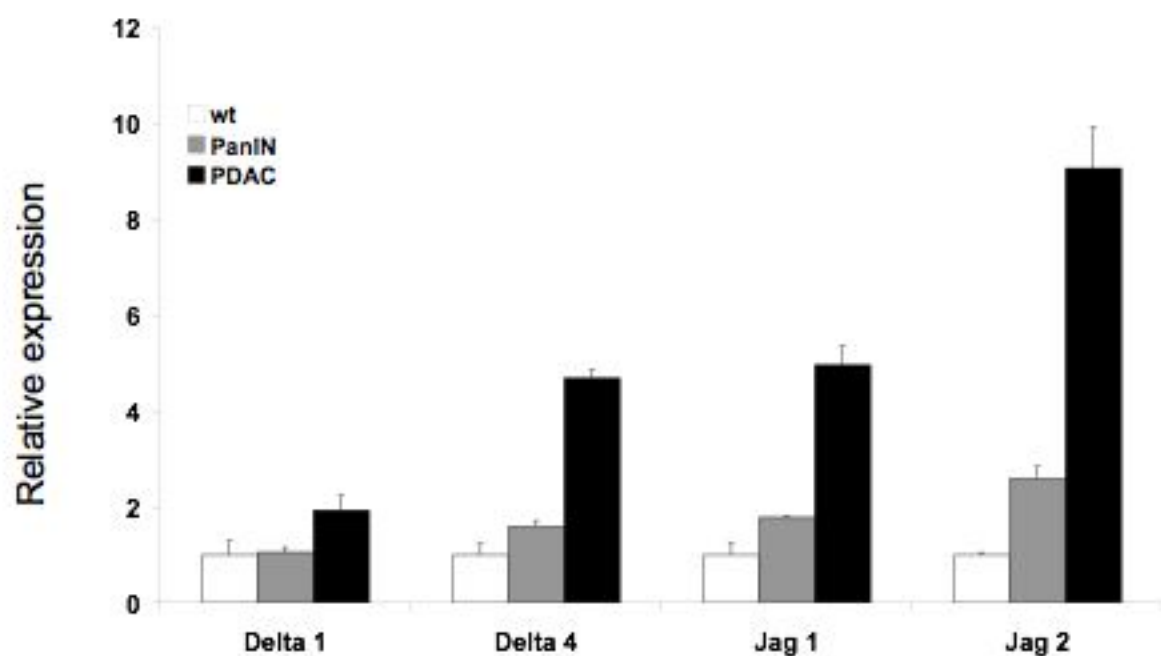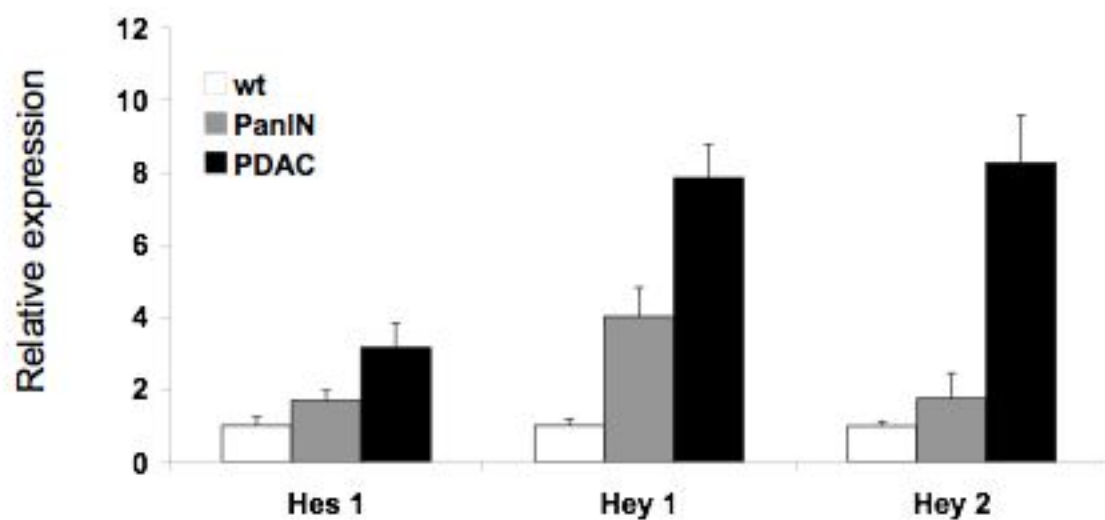

## Supplemental Figure 2

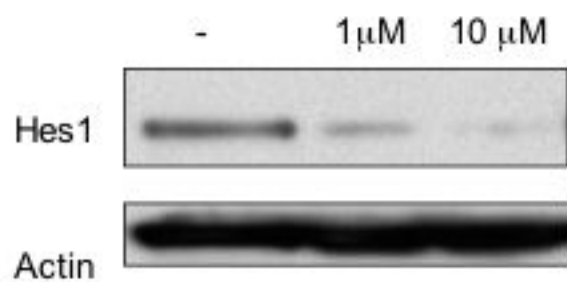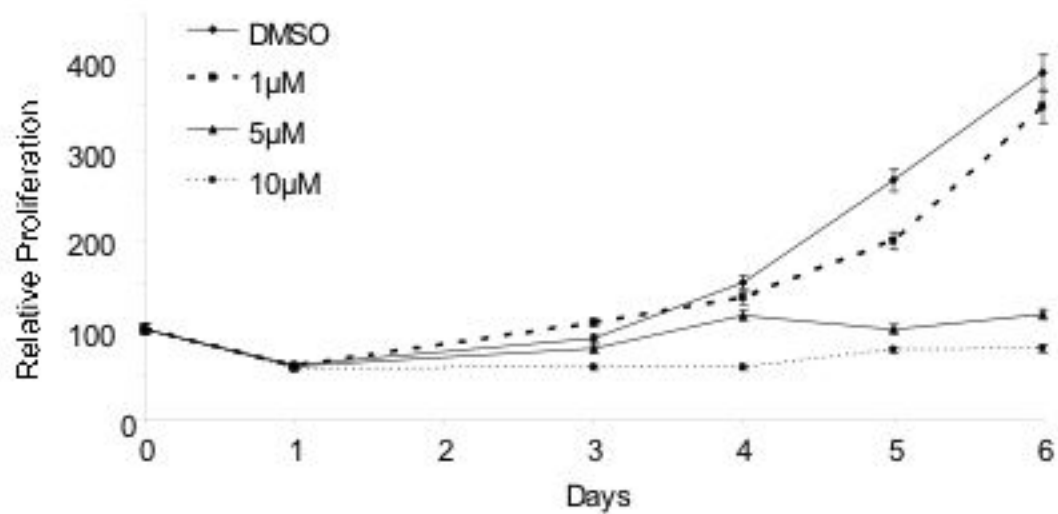

# Supplemental Figure 3

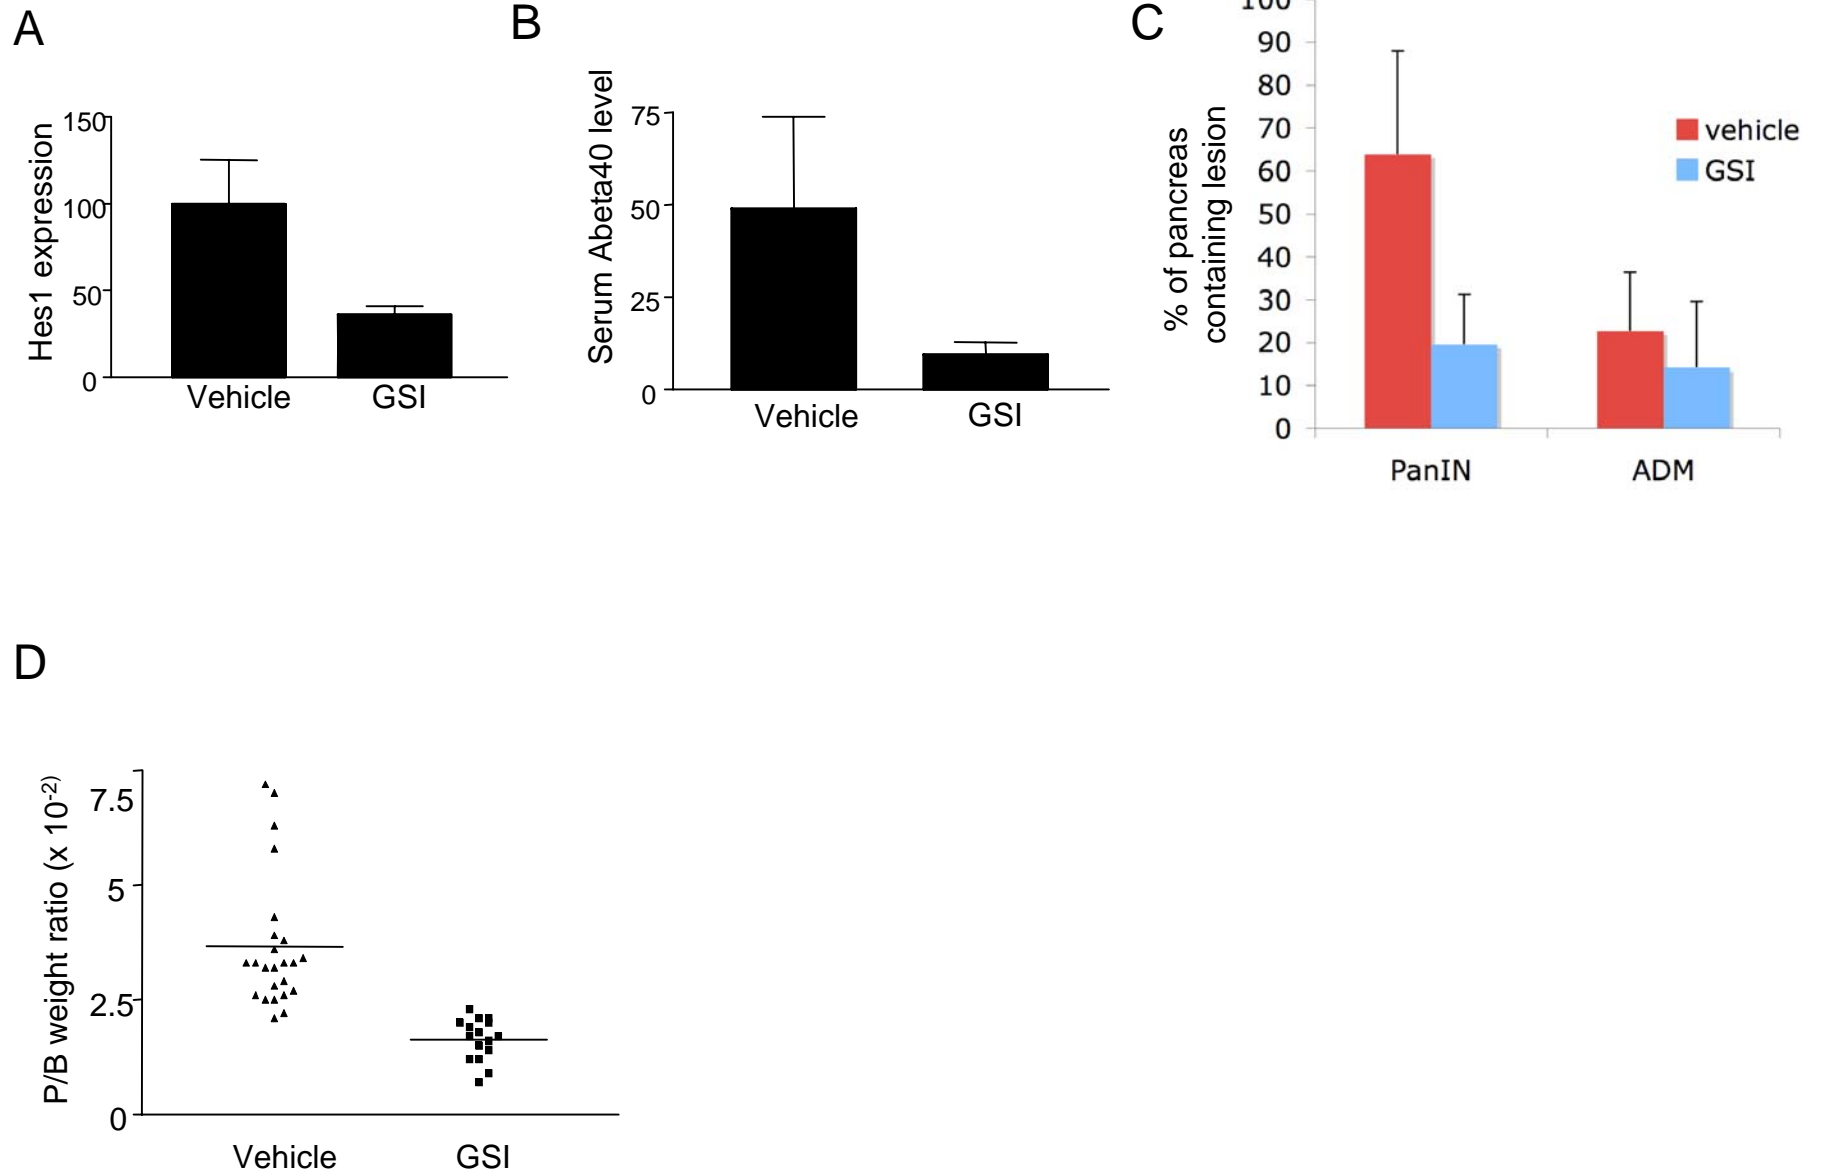

Supplemental Figure 4

A

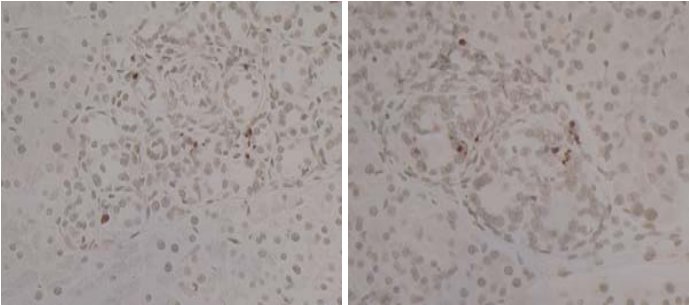

GSI

Vehicle

B

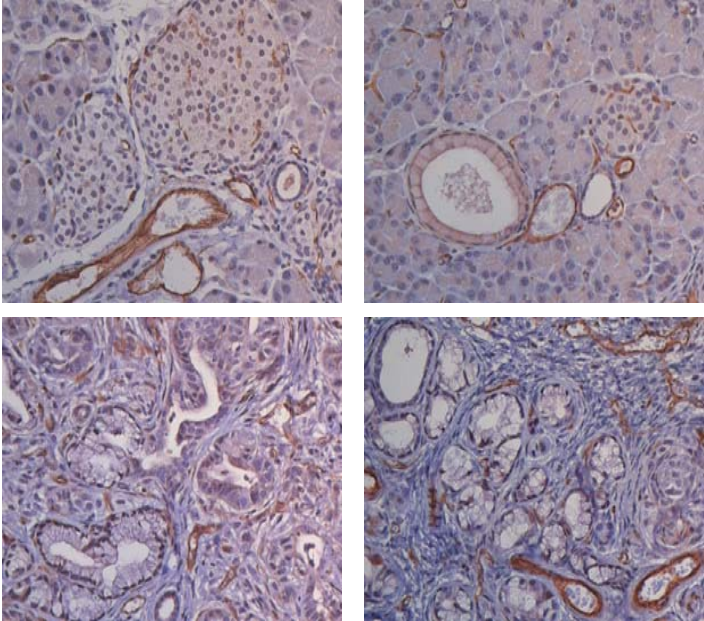

GSI

Vehicle

Supplemental Fig. 5

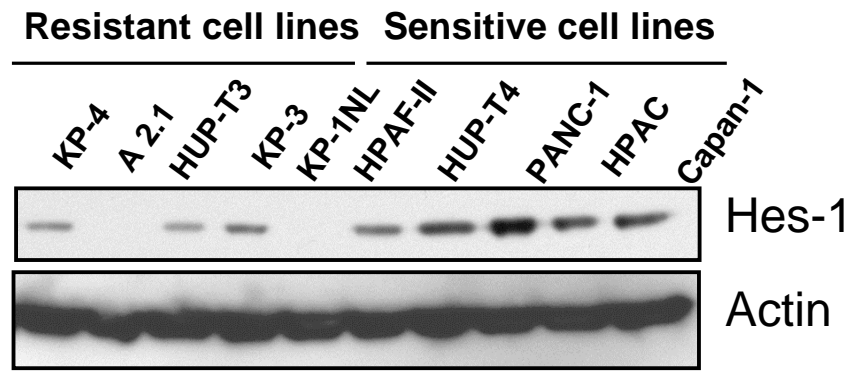

# Supplemental Figure 6

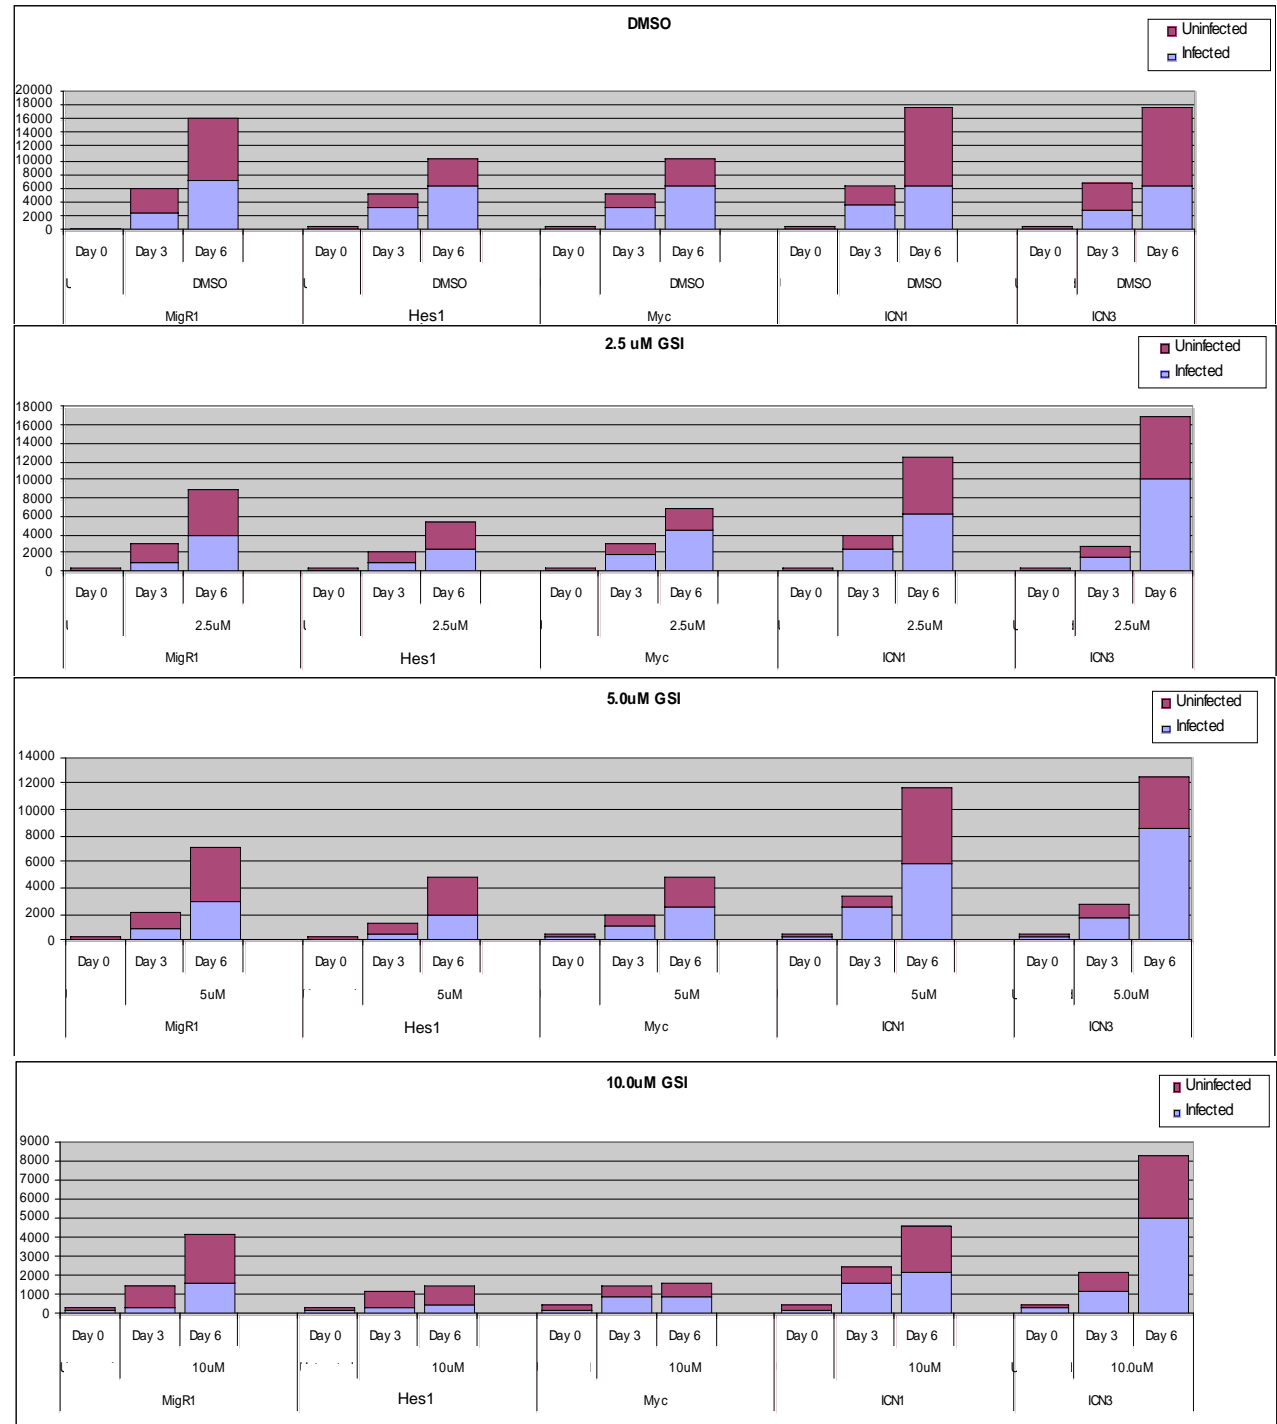

Supplement: NIHMS88478-supplement-02.pdf [file NIHMS88478-supplement-02.pdf]
